# Supplementary material
Source: publisher figshare collection journal article supplement (https://gsajournals.figshare.com/ndownloader/files/15511976)
Supplement: Supplementary file 1 [file 15511976]

**Supporting Table 4: Statistical analysis of Myosin light chain (MYL3) biomarker data, illustrated with results of cardiac scoring and cTNI analysis**

| **Strain** | **Treatment (Trt)** | **Sex** | **Time** | **Sex X Trt** | **Trt X timepoint** |
| --- | --- | --- | --- | --- | --- |
| CC 01 | 1.342 (0.402) | -.001 (0.36) | 0.737 (0.247) | -0.202 (0.525) | -1.676 (0.361) ** *** |
| CC 10 | 2.527 (0.442) *** ** | -0.311(0.396) | - 0.339 (0.427) ** * | 0.176 (0.549) | -1.443 (0.577) * |
| CC 11 | 2.363 (0.329) *** *** | 0.554 (0.322) | 0 (0.364) * | 0.081(0.434) | -1.181 (0.47) ** * |
| CC 19 | 1.538 (0.571) *** | 0.16 (0.389) | 0.285 (0.405) | 0.677(0.62) | -0.284 (0.595) * |
| CC 32 | 1.279 (0.384) *** *** | -0.221(0.361) | - 0.334 (0.256) * | 0.983(0.502) | -0.388 (0.363) *** |
| CC 37 | - 0.118 (0.266) * | 0.171 (0.273) | 0.193 (0.048) ** *** | 0.488 (0.374) | 1.798 (0.067) ** |
| CC 40 | 2.822 (0.329) *** ** | 0.15 (0.34)2 | 0.49 (0.308) ** *** | 0.301(0.467) | -2.951 (0.602) *** *** |
| CC 41 | 0.681 (0.507) * | 0.029 (0.474) | -0.093 (0.421) | 0.178 (0.675) | 0.331 (0.564) |
| CC 42 | 2.093 (0.438) ** | -0.121(0.314) | 1.252 (0.339) | 0.734 (0.498) | -2.878 (0.507) *** |
| CC 51 | 0.949 (0.415) *** * | - 0.017 (0.378) | -0.477 (0.386) * | 0.972 (0.505) | - 0.239 (0.522) |

All values for MYL3 are given as Estimate (standard error). Strains with significant p values for cardiac data (see Table 1) are highlighted in yellow. Benjamini-Hochberg adjusted p-values are indicated as asterisks (see below). Significant p values for MYL3 are shown in black, while those for cTNI are shown in red.

* p< 0.05

** p< 0.01

*** p< 0.001

CC040† : all but two animals in the chronic group died prematurely.
